# Supplementary material
Source: publisher figshare collection journal article supplement (https://springernature.figshare.com/ndownloader/files/21552603)

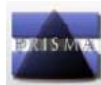

## PRISMA 2009 Checklist

| Section/topic                      | #  | Checklist item                                                                                                                                                                                                                                                                                              | Reported on page #     |
|------------------------------------|----|-------------------------------------------------------------------------------------------------------------------------------------------------------------------------------------------------------------------------------------------------------------------------------------------------------------|------------------------|
| <b>TITLE</b>                       |    |                                                                                                                                                                                                                                                                                                             |                        |
| Title                              | 1  | Identify the report as a systematic review, meta-analysis, or both.                                                                                                                                                                                                                                         | 1                      |
| <b>ABSTRACT</b>                    |    |                                                                                                                                                                                                                                                                                                             |                        |
| Structured summary                 | 2  | Provide a structured summary including, as applicable: background; objectives; data sources; study eligibility criteria, participants, and interventions; study appraisal and synthesis methods; results; limitations; conclusions and implications of key findings; systematic review registration number. | 2-3                    |
| <b>INTRODUCTION</b>                |    |                                                                                                                                                                                                                                                                                                             |                        |
| Rationale                          | 3  | Describe the rationale for the review in the context of what is already known.                                                                                                                                                                                                                              | 4                      |
| Objectives                         | 4  | Provide an explicit statement of questions being addressed with reference to participants, interventions, comparisons, outcomes, and study design (PICOS).                                                                                                                                                  | 5                      |
| <b>METHODS</b>                     |    |                                                                                                                                                                                                                                                                                                             |                        |
| Protocol and registration          | 5  | Indicate if a review protocol exists, if and where it can be accessed (e.g., Web address), and, if available, provide registration information including registration number.                                                                                                                               | 6                      |
| Eligibility criteria               | 6  | Specify study characteristics (e.g., PICOS, length of follow-up) and report characteristics (e.g., years considered, language, publication status) used as criteria for eligibility, giving rationale.                                                                                                      | 6                      |
| Information sources                | 7  | Describe all information sources (e.g., databases with dates of coverage, contact with study authors to identify additional studies) in the search and date last searched.                                                                                                                                  | 6                      |
| Search                             | 8  | Present full electronic search strategy for at least one database, including any limits used, such that it could be repeated.                                                                                                                                                                               | Appendix 2             |
| Study selection                    | 9  | State the process for selecting studies (i.e., screening, eligibility, included in systematic review, and, if applicable, included in the meta-analysis).                                                                                                                                                   | Supplementary figure 1 |
| Data collection process            | 10 | Describe method of data extraction from reports (e.g., piloted forms, independently, in duplicate) and any processes for obtaining and confirming data from investigators.                                                                                                                                  | 6                      |
| Data items                         | 11 | List and define all variables for which data were sought (e.g., PICOS, funding sources) and any assumptions and simplifications made.                                                                                                                                                                       | 6-7                    |
| Risk of bias in individual studies | 12 | Describe methods used for assessing risk of bias of individual studies (including specification of whether this was done at the study or outcome level), and how this information is to be used in any data synthesis.                                                                                      | 7                      |
| Summary measures                   | 13 | State the principal summary measures (e.g., risk ratio, difference in means).                                                                                                                                                                                                                               | 7-8                    |
| Synthesis of results               | 14 | Describe the methods of handling data and combining results of studies, if done, including measures of consistency (e.g., $I^2$ ) for each meta-analysis.                                                                                                                                                   | 8                      |

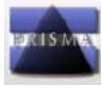

# PRISMA 2009 Checklist

Page 1 of 2

| Section/topic                 | #  | Checklist item                                                                                                                                                                                           | Reported on page #        |
|-------------------------------|----|----------------------------------------------------------------------------------------------------------------------------------------------------------------------------------------------------------|---------------------------|
| Risk of bias across studies   | 15 | Specify any assessment of risk of bias that may affect the cumulative evidence (e.g., publication bias, selective reporting within studies).                                                             | 7                         |
| Additional analyses           | 16 | Describe methods of additional analyses (e.g., sensitivity or subgroup analyses, meta-regression), if done, indicating which were pre-specified.                                                         | 8                         |
| <b>RESULTS</b>                |    |                                                                                                                                                                                                          |                           |
| Study selection               | 17 | Give numbers of studies screened, assessed for eligibility, and included in the review, with reasons for exclusions at each stage, ideally with a flow diagram.                                          | 9, Supplementary figure 1 |
| Study characteristics         | 18 | For each study, present characteristics for which data were extracted (e.g., study size, PICOS, follow-up period) and provide the citations.                                                             | 9, Tables 1 and 2         |
| Risk of bias within studies   | 19 | Present data on risk of bias of each study and, if available, any outcome level assessment (see item 12).                                                                                                | 12, Supplementary table 1 |
| Results of individual studies | 20 | For all outcomes considered (benefits or harms), present, for each study: (a) simple summary data for each intervention group (b) effect estimates and confidence intervals, ideally with a forest plot. | 10-13                     |
| Synthesis of results          | 21 | Present results of each meta-analysis done, including confidence intervals and measures of consistency.                                                                                                  | 11                        |
| Risk of bias across studies   | 22 | Present results of any assessment of risk of bias across studies (see Item 15).                                                                                                                          | 11                        |
| Additional analysis           | 23 | Give results of additional analyses, if done (e.g., sensitivity or subgroup analyses, meta-regression [see Item 16]).                                                                                    | NA                        |
| <b>DISCUSSION</b>             |    |                                                                                                                                                                                                          |                           |
| Summary of evidence           | 24 | Summarize the main findings including the strength of evidence for each main outcome; consider their relevance to key groups (e.g., healthcare providers, users, and policy makers).                     | 14-15                     |
| Limitations                   | 25 | Discuss limitations at study and outcome level (e.g., risk of bias), and at review-level (e.g., incomplete retrieval of identified research, reporting bias).                                            | 16                        |
| Conclusions                   | 26 | Provide a general interpretation of the results in the context of other evidence, and implications for future research.                                                                                  | 16                        |
| <b>FUNDING</b>                |    |                                                                                                                                                                                                          |                           |
| Funding                       | 27 | Describe sources of funding for the systematic review and other support (e.g., supply of data); role of funders for the systematic review.                                                               | 1                         |

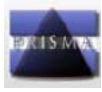

# PRISMA 2009 Checklist

*From:* Moher D, Liberati A, Tetzlaff J, Altman DG, The PRISMA Group (2009). Preferred Reporting Items for Systematic Reviews and Meta-Analyses: The PRISMA Statement. PLoS Med 6(7): e1000097. doi:10.1371/journal.pmed1000097

For more information, visit: [www.prisma-statement.org](http://www.prisma-statement.org).

## Appendix 2. Literature search strategy.

### *PubMed*

(antigens, CD274[majr] OR B7DC[tiab] OR "B7-DC"[tiab] OR B7H1[tiab] OR "B7-H1"[tiab] OR BTLA[tiab] OR CD152[tiab] OR CD272[tiab] OR CD273[tiab] OR CD274[tiab] OR CD279[tiab] OR cell cycle checkpoints[majr] OR checkpoint[tiab] OR checkpoints[tiab] OR CTLA-4 antigen[majr] OR CTLA4[tiab] OR "CTLA-4"[tiab] OR "cytotoxic T-lymphocyte antigen 4"[tiab] OR "cytotoxic T-lymphocyte antigen4"[tiab] OR "immune stimulated"[tiab] OR "immune stimulating"[tiab] OR "immune stimulation"[tiab] OR "immune stimulations"[tiab] OR "immune stimulator"[tiab] OR "immune stimulators"[tiab] OR "immune stimulatory"[tiab] OR "lymphocyte attenuator"[tiab] OR "lymphocyte attenuators"[tiab] OR "PD ligand"[tiab] OR "PD ligands"[tiab] OR PD1[tiab] OR "PD-1"[tiab] OR PDCD1[tiab] OR PDCD1LG2[tiab] OR PDL1[tiab] OR "PD-L1"[tiab] OR PDL2[tiab] OR "PD-L2"[tiab] OR programmed cell death 1 ligand 2 protein[majr] OR "programmed cell death 1 ligand 1 protein"[tiab] OR "programmed cell death 1 ligand 2 protein"[tiab] OR programmed cell death 1 receptor[majr] OR "programmed cell death 1"[tiab] OR "programmed cell death ligand 1"[tiab] OR "programmed cell death ligand 2"[tiab] OR "programmed death 1"[tiab] OR "programmed death ligand"[tiab] OR "soluble PD-1"[tiab] OR "soluble PD1"[tiab] OR "soluble PD-L1"[tiab] OR "soluble PDL1"[tiab] OR "soluble programmed cell death receptor-1"[tiab] OR "soluble programmed cell death ligand-1"[tiab] OR "sPD-1"[tiab] OR "sPD1"[tiab] OR "sPD-L1"[tiab] OR "sPDL1"[tiab]) AND (sepsis[majr] OR sepsis[tiab] OR septic[tiab] OR septicemia[tiab] OR bacterial infections[majr] OR "bacterial infection"[tiab] OR "bacterial infections"[tiab] OR critical illness[majr] OR "critical illness"[tiab] OR "critical illnesses"[tiab] OR "critically ill"[tiab] OR critical care[majr] OR "critical care"[tiab] OR endotoxins[majr] OR endotoxin[tiab] OR endotoxins[tiab] OR endotoxemia[majr] OR endotoxemia[tiab] OR lipopolysaccharides[majr] OR lipopolysaccharide[tiab] OR lipopolysaccharides[tiab] OR "systemic inflammation"[tiab] OR "Bacterial Infections and Mycoses"[Mesh] OR "Virus Diseases"[Mesh]) AND ("Animals"[Mesh:NoExp] OR mouse[tiab] OR mice[tiab] OR rat[tiab] OR rats[tiab] OR dog[tiab] OR dogs[tiab] OR canine[tiab] OR "guinea pig"[tiab] OR "guinea pigs"[tiab] OR swine[tiab] OR pig[tiab] OR pigs[tiab] OR primate[tiab] OR primates[tiab]) AND ("3C10 monoclonal antibody"[tiab] OR abatacept[majr] OR abatacept[tiab] OR "anti-PD1"[tiab] OR "anti-PD-1"[tiab] OR "anti-PDL1"[tiab] OR "anti-PD-L1"[tiab] OR "anti-PDL2"[tiab] OR "anti-PD-L2"[tiab] OR atezolizumab[tiab] OR avelumab[tiab] OR durvalumab[tiab] OR ipilimumab[tiab] OR keytruda[tiab] OR lambrolizumab[tiab] OR nivolumab[tiab] OR opdivo[tiab] OR pembrolizumab[tiab] OR pidilizumab[tiab] OR tremelimumab[tiab] OR antagonists and inhibitors[subheading] OR antagonist[tiab] OR antagonists[tiab] OR inhibitor[tiab] OR inhibitors[tiab] OR inhibition[tiab] OR blockade[tiab] OR blocker[tiab] OR blockers[tiab])

### *EMBASE*

('programmed death 1 ligand 1'/exp/mj OR b7dc:ti,ab OR 'b7-dc':ti,ab OR b7h1:ti,ab OR 'b7-h1':ti,ab OR b7la:ti,ab OR cd152:ti,ab OR cd272:ti,ab OR cd273:ti,ab OR cd274:ti,ab OR cd279:ti,ab OR 'cell cycle checkpoint'/exp/mj OR checkpoint:ti,ab OR checkpoints:ti,ab OR 'cytotoxic t lymphocyte antigen 4'/exp/mj OR ctla4:ti,ab OR 'ctla-4':ti,ab OR 'cytotoxic t-

lymphocyte antigen 4':ti,ab OR 'cytotoxic t-lymphocyte antigen4':ti,ab OR 'immune stimulated':ti,ab OR 'immune stimulating':ti,ab OR 'immune stimulation':ti,ab OR 'immune stimulations':ti,ab OR 'immune stimulator':ti,ab OR 'immune stimulators':ti,ab OR 'immune stimulatory':ti,ab OR 'lymphocyte attenuator':ti,ab OR 'lymphocyte attenuators':ti,ab OR 'pd ligand':ti,ab OR 'pd ligands':ti,ab OR pd1:ti,ab OR 'pd-1':ti,ab OR pcd1:ti,ab OR pcd1lg2:ti,ab OR pdl1:ti,ab OR 'pd-l1':ti,ab OR pdl2:ti,ab OR 'pd-l2':ti,ab OR 'programmed death 1 ligand 2'/exp/mj OR 'programmed cell death 1 ligand 1 protein':ti,ab OR 'programmed cell death 1 ligand 2 protein':ti,ab OR 'programmed death 1 receptor'/exp/mj OR 'programmed cell death 1':ti,ab OR 'programmed cell death ligand 1':ti,ab OR 'programmed cell death ligand 2':ti,ab OR 'programmed death 1':ti,ab OR 'programmed death ligand':ti,ab OR 'soluble pd-1':ti,ab OR 'soluble pd1':ti,ab OR 'soluble pd-l1':ti,ab OR 'soluble pdl1':ti,ab OR 'soluble programmed cell death receptor-1':ti,ab OR 'soluble programmed cell death ligand-1':ti,ab OR 'spd-1':ti,ab OR 'spd1':ti,ab OR 'spd-l1':ti,ab OR 'spd11':ti,ab) AND ('sepsis'/exp/mj OR sepsis:ti,ab OR septic:ti,ab OR septicemia:ti,ab OR 'bacterial infection'/exp/mj OR 'bacterial infection':ti,ab OR 'bacterial infections':ti,ab OR 'critical illness'/exp/mj OR 'critical illness':ti,ab OR 'critical illnesses':ti,ab OR 'critically ill':ti,ab OR 'intensive care'/exp/mj OR 'critical care':ti,ab OR 'endotoxin'/exp/mj OR endotoxin:ti,ab OR endotoxins:ti,ab OR 'endotoxemia'/exp/mj OR endotoxemia:ti,ab OR 'lipopolysaccharide'/exp/mj OR lipopolysaccharide:ti,ab OR lipopolysaccharides:ti,ab OR 'systemic inflammation':ti,ab OR 'infection'/exp/mj OR 'virus infection'/exp/mj) AND ('animal'/exp/mj OR mouse:ti,ab OR mice:ti,ab OR rat:ti,ab OR rats:ti,ab OR dog:ti,ab OR dogs:ti,ab OR canine:ti,ab OR 'guinea pig':ti,ab OR 'guinea pigs':ti,ab OR swine:ti,ab OR pig:ti,ab OR pigs:ti,ab OR primate:ti,ab OR primates:ti,ab) AND ('3c10 monoclonal antibody':ti,ab OR 'abatacept'/exp/mj OR abatacept:ti,ab OR 'anti-pd1':ti,ab OR 'anti-pd-1':ti,ab OR 'anti-pdl1':ti,ab OR 'anti-pd-l1':ti,ab OR 'anti-pdl2':ti,ab OR 'anti-pd-l2':ti,ab OR 'atezolizumab'/exp/mj OR atezolizumab:ti,ab OR 'avelumab'/exp/mj OR avelumab:ti,ab OR 'durvalumab'/exp/mj OR durvalumab:ti,ab OR 'ipilimumab'/exp/mj OR ipilimumab:ti,ab OR 'pembrolizumab'/exp/mj OR keytruda:ti,ab OR lambrolizumab:ti,ab OR 'nivolumab'/exp/mj OR nivolumab:ti,ab OR opdivo:ti,ab OR pembrolizumab:ti,ab OR 'pidilizumab'/exp/mj OR pidilizumab:ti,ab OR 'ticilimumab'/exp/mj OR tremelimumab:ti,ab OR antagonist:ti,ab OR antagonists:ti,ab OR inhibitor:ti,ab OR inhibitors:ti,ab OR inhibition:ti,ab OR blockade:ti,ab OR blocker:ti,ab OR blockers:ti,ab)

### *Scopus*

TITLE-ABS ( b7dc OR "B7-DC" OR b7h1 OR "B7-H1" OR b7la OR cd152 OR cd272 OR cd273 OR cd274 OR cd279 OR checkpoint OR checkpoints OR ctla4 OR "CTLA-4" OR "cytotoxic T-lymphocyte antigen 4" OR "cytotoxic T-lymphocyte antigen4" OR "immune stimulated" OR "immune stimulating" OR "immune stimulation" OR "immune stimulations" OR "immune stimulator" OR "immune stimulators" OR "immune stimulatory" OR "lymphocyte attenuator" OR "lymphocyte attenuators" OR "PD ligand" OR "PD ligands" OR pd1 OR "PD-1" OR pcd1 OR pcd1lg2 OR pdl1 OR "PD-L1" OR pdl2 OR "PD-L2" OR "programmed cell death 1 ligand 1 protein" OR "programmed cell death 1 ligand 2 protein" OR "programmed cell death 1" OR "programmed cell death ligand 1" OR "programmed cell death ligand 2" OR "programmed death 1" OR "programmed death ligand" OR "soluble PD-

1" OR "soluble PD1" OR "soluble PD-L1" OR "soluble PDL1" OR "soluble programmed cell death receptor-1" OR "soluble programmed cell death ligand-1" OR "sPD-1" OR "sPD1" OR "sPD-L1" OR "sPDL1" ) AND TITLE-ABS ( sepsis OR septic OR septicemia OR "bacterial infection" OR "bacterial infections" OR "critical illness" OR "critical illnesses" OR "critically ill" OR "critical care" OR endotoxin OR endotoxins OR endotoxemia OR lipopolysaccharide OR lipopolysaccharides OR "systemic inflammation" ) AND TITLE-ABS ( mouse OR mice OR rat OR rats OR dog OR dogs OR canine OR "guinea pig" OR "guinea pigs" OR swine OR pig OR pigs OR primate OR primates ) AND TITLE-ABS ( "3C10 monoclonal antibody" OR abatacept OR "anti-PD1" OR "anti-PD-1" OR "anti-PDL1" OR "anti-PD-L1" OR "anti-PDL2" OR "anti-PD-L2" OR atezolizumab OR avelumab OR durvalumab OR ipilimumab OR keytruda OR lambrolizumab OR nivolumab OR opdivo OR pembrolizumab OR pidilizumab OR tremelimumab OR antagonist OR antagonists OR inhibitor OR inhibitors OR inhibition OR blockade OR blocker OR blockers )

### *Web of Science*

TOPIC: (B7DC OR B7-DC OR B7H1 OR B7-H1 OR BTLA OR CD152 OR CD272 OR CD273 OR CD274 OR CD279 OR checkpoint OR checkpoints OR CTLA4 OR CTLA-4 OR cytotoxic T-lymphocyte antigen 4 OR cytotoxic T-lymphocyte antigen4 OR immune stimulated OR immune stimulating OR immune stimulation OR immune stimulations OR immune stimulator OR immune stimulators OR immune stimulatory OR lymphocyte attenuator OR lymphocyte attenuators OR PD ligand OR PD ligands OR PD1 OR PD-1 OR PDCD1 OR PDCD1LG2 OR PDL1 OR PD-L1 OR PDL2 OR PD-L2 OR programmed cell death 1 ligand 1 protein OR programmed cell death 1 ligand 2 protein OR programmed cell death 1 OR programmed cell death ligand 1 OR programmed cell death ligand 2 OR programmed death 1 OR programmed death ligand OR soluble PD-1 OR soluble PD1 OR soluble PD-L1 OR soluble PDL1 OR soluble programmed cell death receptor-1 OR soluble programmed cell death ligand-1 OR sPD-1 OR sPD1 OR sPD-L1 OR sPDL1) AND TOPIC: (sepsis OR septic OR septicemia OR bacterial infection OR bacterial infections OR critical illness OR critical illnesses OR critically ill OR critical care OR endotoxin OR endotoxins OR endotoxemia OR lipopolysaccharide OR lipopolysaccharides OR systemic inflammation) AND TOPIC: (mouse OR mice OR rat OR rats OR dog OR dogs OR canine OR guinea pig OR guinea pigs OR swine OR pig OR pigs OR primate OR primates) AND TOPIC:(3C10 monoclonal antibody OR abatacept OR anti-PD1 OR anti-PD-1 OR anti-PDL1 OR anti-PD-L1 OR anti-PDL2 OR anti-PD-L2 OR atezolizumab OR avelumab OR durvalumab OR ipilimumab OR keytruda OR lambrolizumab OR nivolumab OR opdivo OR pembrolizumab OR pidilizumab OR tremelimumab OR antagonist OR antagonists OR inhibitor OR inhibitors OR inhibition OR blockade OR blocker OR blockers)

**Appendix 3:** Effect of checkpoint inhibitor treatment on serum and tissue cytokines, immune cell populations, and apoptosis. Refer to Table 5 for detailed results.

Five experiments reported the effects of CPI treatment on serum cytokine levels. Anti-PD-L1 increased serum TNF $\alpha$  and IL-6 and decreased IL-10 on D+1 after CLP and decreased IL-6, IL-10, MIP-2, KC and IL-17 on D+2 after ID *P. aeruginosa* ( $p \leq 0.05$ ); anti-PD-1 and anti-CTLA-4 had no significant effect on IL-6, IL-10, TNF $\alpha$  or IFN $\gamma$  on D+2 after CLP (all  $p = ns$ ); and anti-BTLA increased serum MIP-2 on D+1 after CLP ( $p < 0.05$ ) but had no significant effect ( $p = ns$ ) on TNF $\alpha$ , IL-1 $\beta$ , IL-6, IL-10, IL-12, KC, or MCP-1. In this latter study, anti-BTLA increased peritoneal lavage TNF $\alpha$ , IL-10, IL-12, KC, MIP-2, and MCP-1 ( $p \leq 0.05$ ) but did not significantly alter IL-1 $\beta$  and IL-6 on D+1.

Eight experiments reported the effects of CPI treatment on *ex-vivo* immune cell cytokine or nitric oxide (NO) production. Anti-PD-1 increased CD3/CD28-stimulated splenocyte production of IL-6 but not TNF $\alpha$ , IL-10 and IFN $\gamma$  at D+2 after CLP in one experiment, increased CD3/CD28-stimulated splenocyte production of IFN $\gamma$  on D9 after CLP and subsequent *C. albicans* infection, and increased splenic NK, CD4 and CD8 intracellular IFN $\gamma$  levels on D+9 after CLP and subsequent *C. albicans* infection; anti-PD-L1 decreased heat killed *L. monocytogenes* stimulated splenocyte TNF $\alpha$ , IL-12p40 and NO and NK cell IFN $\gamma$  production on D+3 after IV *L. monocytogenes* challenge, increased spleen and lymph node CD8 IFN $\gamma$ , decreased lymph node CD4 IFN $\gamma$  but did not alter spleen CD4 IFN $\gamma$  on D+2 after ID *P. aeruginosa*, and did not alter CD3/CD28-stimulated splenocyte IFN $\gamma$  on D+9 after CLP and subsequent *C. albicans* infection; anti-CTLA-4 did not alter CD3/CD28-stimulated splenocyte

production of TNF $\alpha$ , IL-6 or IL-10 on D+2 after CLP; and anti-BTLA increased LPS-stimulated macrophage production of TNF $\alpha$  and MIP-2 on D+1 after CLP.

Nine experiments reported the effects of CPI treatment on changes in immune cell numbers and phenotype. Anti-PD-L1 treatment decreased splenic *L. monocytogenes*-specific and IFN $\gamma$ -producing CD8 cells on D+7 after IV *L. monocytogenes*, increased total cell numbers, CD3 and CD19 cell numbers in blood, spleen and thymus on D+1, increased IFN $\gamma$  producing CD4 and CD8 cells and increased MHCII expression on DCs and macrophages on D+9 after CLP and subsequent fungal challenge and increased spleen and lymph node CD4 and CD8 cell numbers and CD28 expression, CD19+ B-cells in lymph nodes, but not in spleen, on D+2 after ID *P. aeruginosa* (all  $p \leq 0.05$ ). Anti-PD-1 treatment increased splenic CD4 and CD8 cells, B-cells, NK cells, and dendritic cells on D+2 after CLP, increased macrophage and DC MHCII expression on D+9 after CLP followed by fungal infection, and increased lymph node CD4/CD28 and CD8/CD28 cells (all  $p \leq 0.05$ ) but did not significantly alter splenic and lymph node CD4/CD28 and CD8/CD28, macrophages, or dendritic cells on D+9 after CLP and subsequent *C. albicans* challenge ( $p = ns$ ). Anti-CTLA-4 treatment did not significantly alter total splenocyte CD4, CD8 numbers or naïve, or effector or central memory phenotype cells at D+7 following CLP. Finally, anti-BTLA treatment increased total peritoneal leukocytes and F4/80 CD11c and Gr1+ cells on D+1 after CLP ( $p < 0.05$ ).

Seven experiments reported the effects of CPI on apoptosis. Anti-PD-L1 treatment did not affect the frequency of Annexin V positive CD8 cells on D+1, decreased splenic and thymus lymphocyte apoptosis on D+1 after CLP and decreased splenic CD4 and CD8 cell apoptosis on D+2 and D+3 after CLP (all  $p \leq 0.05$ ); anti-PD-1 treatment decreased splenic CD3 T cell apoptosis on D+2 after CLP ( $p < 0.05$ ); anti-CTLA-4 treatment decreased splenic CD4 and CD8



cell apoptosis on D+2 after CLP ( $p < 0.05$ ); and anti-BTLA did not significantly alter peritoneal total cell or macrophage apoptosis on D+1 after CLP ( $p = \text{ns}$ ).

### **Supplementary Figure Legends**

**Supplementary Figure 1.** Flow chart of literature search and study selection.

**Supplementary Figure 2.** Funnel plot of odds ratio (OR) of survival. Publication bias was assessed by funnel plot and Egger's regression. This assessment suggested that the overall survival results were not subject to publication bias (Egger's statistic  $p=0.96$ ).

Supplementary Table 1. Effect of bacterial challenge on the checkpoint molecules targeted in analyzed experiments

| Author/year      | Exp ID | Checkpoint Molecule Target | Bacterial Challenge          | Infection Site | Summary of Effect of Challenge on Targeted Molecule in Animals not Receiving Checkpoint Inhibitor Treatment                                                                                                |
|------------------|--------|----------------------------|------------------------------|----------------|------------------------------------------------------------------------------------------------------------------------------------------------------------------------------------------------------------|
| Seo 2008         | 1      | PD-L1                      | <i>L. monocytogenes</i>      | IV             | Splenic CD4, CD8, NK, and macrophage PD-L1 expression increased on D+3 compared to noninfected controls (no p-value reported)                                                                              |
| Brahmamdham 2010 | 1      | PD-1                       | CLP                          | IP             | Splenic CD4 and CD8 PD-1 expression increased on D+2,+4,+7 compared to noninfected controls^^                                                                                                              |
| Zhang* 2010      | 1      | PD-L1                      | CLP                          | IP             | Circulating CD19+ B cell and CD11b+ monocyte PD-1 and PD-L1 and CD3+ PD-1 expression increased on D+1 compared to noninfected controls^^, but CD3+ PD-L1 expression was not different (p=ns)               |
|                  | 2      | PD-L1                      | CLP                          | IP             |                                                                                                                                                                                                            |
| Inoue** 2011     | 1      | CTLA-4                     | CLP                          | IP             | Splenic CD4+ CTLA-4 expression increased on D+1,+4,+7 ^, Splenic CD8+ CTLA-4 expression increased on D+4 and +7^, Splenic Treg CTLA-4 expression increased at D+1 and +7^ compared to noninfected controls |
|                  | 2      | CTLA-4                     | CLP                          | IP             |                                                                                                                                                                                                            |
|                  | 3      | CTLA-4                     | CLP                          | IP             |                                                                                                                                                                                                            |
|                  | 4      | CTLA-4                     | CLP ( <i>Candida</i> D+4)### | IP             |                                                                                                                                                                                                            |
| Kobayashi 2013   | 1      | BTLA                       | LPS                          | IV             | NR                                                                                                                                                                                                         |
| Chang 2013       | 1      | PD-1                       | CLP ( <i>Candida</i> D+3)    | IP and IV      | Splenic CD4 + T cell PD-1 expression increased on D+3 (before <i>Candida</i> ) and D+5,+9,+12 compared to baseline^. Splenic CD8+ T cell PD-1 expression increased on D+3 and +5 compared to baseline^     |
|                  | 2      | PD-L1                      | CLP ( <i>Candida</i> D+3)    | IP and IV      |                                                                                                                                                                                                            |
|                  | 3      | CTLA-4                     | CLP ( <i>Candida</i> D+3)    | IP and IV      | NR                                                                                                                                                                                                         |
| Shindo 2015      | 1      | PD-1                       | CLP ( <i>Candida</i> D+3)    | IP and IV      | NR                                                                                                                                                                                                         |
| Cheng 2016       | 1      | BTLA                       | CLP                          | IP and IV      | Peritoneal F4/80 macrophage and CD11c DC BTLA expression increased and circulating CD115 <sup>+</sup> DC BTLA expression decreased on D+1 compared to noninfected controls^                                |
| Shindo 2017      | 1      | PD-L1                      | CLP ( <i>Candida</i> D+3)    | IP and IV      | Splenic NK, NKT, and CD4 PD-L1 expression increased^^ on D+7 compared to noninfected controls but splenic CD8, macrophage, and B cell PD-L1 expression not different (p=ns)                                |
| Deng# 2018       | 1      | PD-L1                      | CLP                          | IP             | NR                                                                                                                                                                                                         |
|                  | 2      | PD-L1                      | CLP                          | IP             | NR                                                                                                                                                                                                         |
| Patil 2018       | 1      | PD-L1                      | <i>P. aeruginosa</i>         | Dermal         | Splenic CD11c DC and F4/80 macrophage PD-L1 expression increased on D+2 compared to noninfected controls^ but splenic Ly6c monocytes and CD4 and CD8 PD-1 expression not different (p=ns)                  |
|                  | 2      | PD-L1                      | <i>S. aureus</i>             | IV             | NR                                                                                                                                                                                                         |

\*exp 1 treatment administered at D-1 and exp 2 treatment administered at D0; \*\*exp 1 administered 50µg and exp 2 administered 200µg anti-CTLA-4 in CD-1 mice, exp 3 administered 50µg anti-CTLA-4 in C57BL6 mice; #exp 1 performed in C57BL6J mice and exp 2 in Bmal1<sup>Mye-/-</sup> mice; ### intravenous *Candida* challenge 4 days following CLP; ^p<0.05 ; ^^p≤0.01

Exp ID – number assigned to the experiment(s) providing survival data in each study; PD-1 - programmed cell death 1; PD-L1 – programmed cell death ligand-1; CTLA-4 – cytotoxic T lymphocyte associated protein-4; BTLA – B and T lymphocyte attenuator; CLP – cecal ligation and puncture; DC – dendritic cell; D – day; IV - intravenous; IP - intraperitoneal; NR – not reported

# Literature Search Results

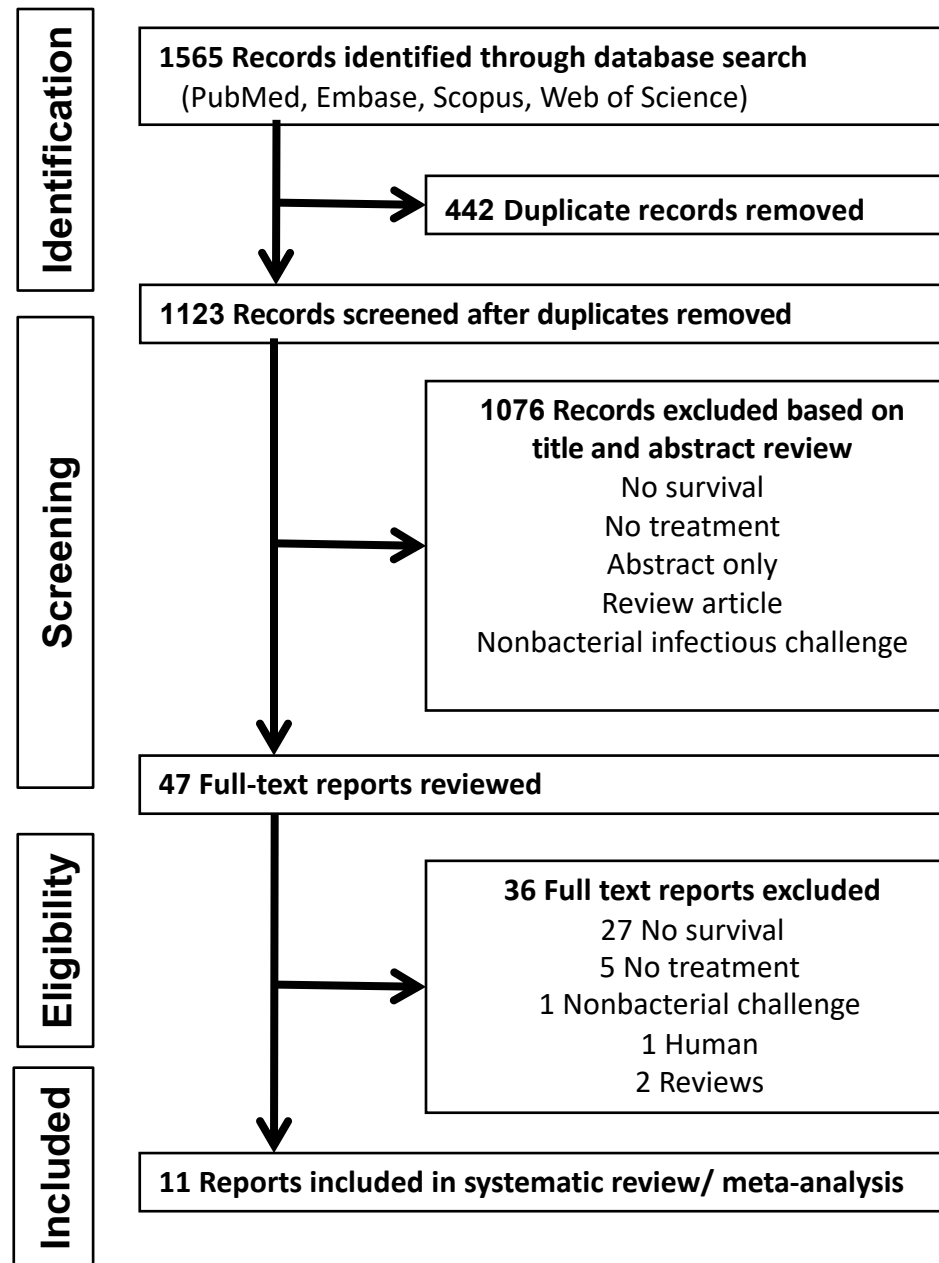

Supplementary Figure 2

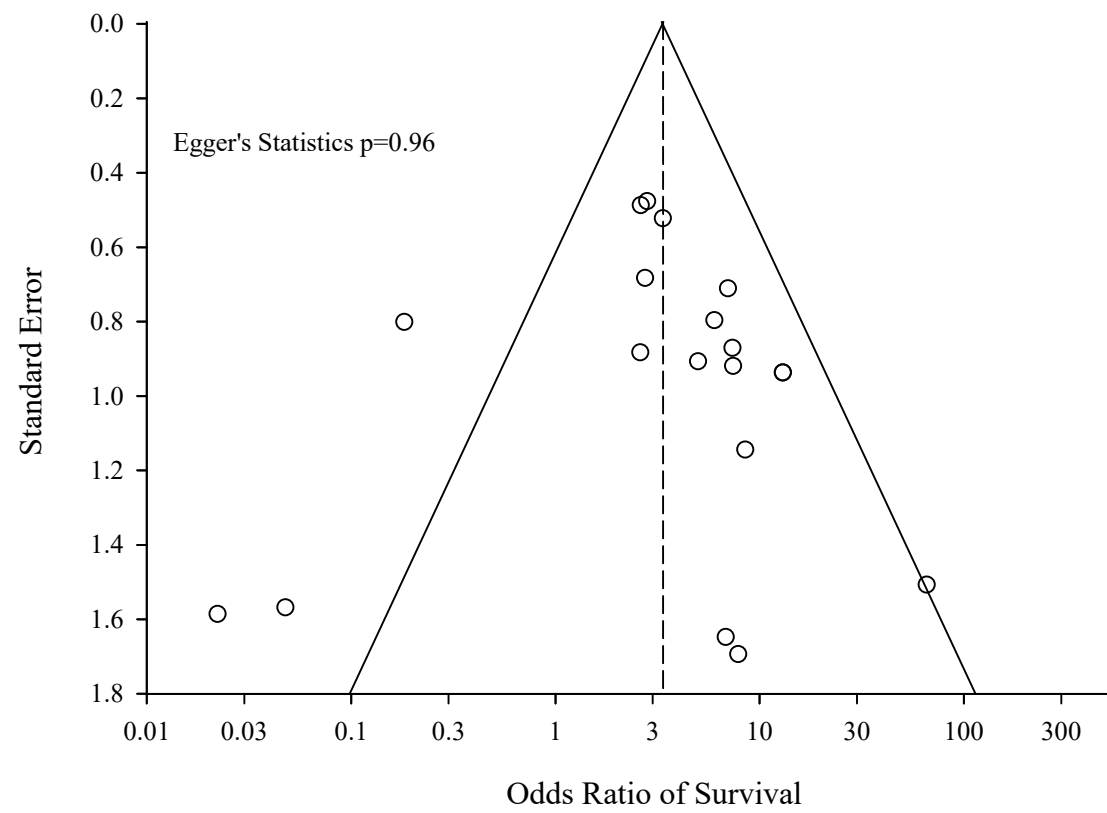

Supplement: Supplementary file [file 21552603]
